# Supplementary material for: Discovery of a Novel Aminocyclopropenone Compound That Inhibits BRD4-Driven Nucleoporin NUP210 Expression and Attenuates Colorectal Cancer Growth
Source: MDPI journal article supplement (doi:10.3390/cells11030317), 2022-01-18
Supplement: s1 [file s1]

## **Supporting Information**

### **Discovery of a Novel Aminocyclopropenone Compound that Inhibits BRD4-driven Nucleoporin NUP210 Expression and Attenuates Colorectal Cancer Growth**

Hiroya Kondo <sup>1</sup>, Kenji Mishiro <sup>2</sup>, Yuki Iwashima <sup>3</sup>, Qiu Yujia <sup>4</sup>, Akiko Kobayashi <sup>2</sup>, Keesiang Lim <sup>4</sup>, Toshinari Minamoto <sup>5</sup>, Kazuma Ogawa <sup>2</sup>, Munetaka Kunishima <sup>6</sup>, Masaharu Hazawa <sup>2,3,4,\*</sup> and Richard W. Wong <sup>2,3,4,\*</sup>

- <sup>1</sup> Division of Transdisciplinary Sciences, Graduate School of Frontier Science Initiative, Kanazawa University, Kakuma-machi, Kanazawa, Ishikawa 920-1192, Japan; hiro4015@stu.kanazawa-u.ac.jp
- <sup>2</sup> Institute for Frontier Science Initiative, Kanazawa University, Kakuma-machi, Kanazawa, Ishikawa 920-1192, Japan; mishiro@p.kanazawa-u.ac.jp (K.M.); akoba@staff.kanazawa-u.ac.jp (A.K.); kogawa@p.kanazawa-u.ac.jp (K.O.)
- <sup>3</sup> Laboratory of Molecular Cell Biology, School of Natural System, Institute of Science and Engineering, Kanazawa University, Kakuma-machi, Kanazawa, Ishikawa 920-1192, Japan; yuki090606@stu.kanazawa-u.ac.jp
- <sup>4</sup> WPI-Nano Life Science Institute, Kanazawa University, Kakuma-machi, Kanazawa, Ishikawa 920-1192, Japan; porthos0616@gmail.com (Q.Y.); limkeesiang@staff.kanazawa-u.ac.jp (K.L.)
- <sup>5</sup> Division of Translational and Clinical Oncology, Cancer Research Institute, Kanazawa University, Kanazawa, Ishikawa 920-0934, Japan; minamoto@staff.kanazawa-u.ac.jp
- <sup>6</sup> Faculty of Pharmaceutical Sciences, Institute of Medical, Pharmaceutical, and Health Sciences, Kanazawa University, Kakuma-machi, Kanazawa 920-1192 Japan; kunisima@p.kanazawa-u.ac.jp
- \* Correspondence: masaharu.akj@gmail.com (M.H.); rwong@staff.kanazawa-u.ac.jp (R.W.); Tel.: +81-076-264-6253

## **Table of Contents**

|                                                      |              |
|------------------------------------------------------|--------------|
| <b>Antibodies (Table S1) .....</b>                   | <b>S2</b>    |
| <b>Primers sequences for qRT-PCR (Table S2).....</b> | <b>S3-S4</b> |

**Table S1.** Antibodies

| <b>Antibody</b>                             | <b>Company</b>            | <b>Catalog #</b> |
|---------------------------------------------|---------------------------|------------------|
| $\beta$ -actin                              | Cell Signaling Technology | 4967S            |
| BRD4                                        | Abcam                     | ab128874         |
| BRD4                                        | Cell Signaling Technology | 13440s           |
| NUP58                                       | Sigma                     | HPA039360        |
| mrnp41 (H-3)                                | Santa Cruz Biotechnology  | sc-393252        |
| NUP37                                       | Santa Cruz Biotechnology  | sc-109348        |
| MYC                                         | Wako                      | 017-21871        |
| NUP210                                      | Santa Cruz Biotechnology  | sc-79500         |
| Goat anti-Rabbit IgG (H+L), Alexa Fluor 488 | Thermo Fisher Scientific  | A11034           |
| anti-Mouse IgG                              | Cell Signaling Technology | 7076S            |
| anti-Rabbit IgG                             | Cell Signaling Technology | 7074S            |
| anti-Goat IgG                               | Invitrogen                | #PA1-28664       |

**Table S2.** Primer sequences used for qRT-PCR.

| Name     | Sequence                 |
|----------|--------------------------|
| NUP35-F  | CTAGCCCAGGACTTGGATCA     |
| NUP35-R  | ACTCTAGCCTGGGCAACTGA     |
| NUP93-F  | GTTTGAAGAGGCAGCAAAGC     |
| NUP93-R  | ACAGGGCTCAGCAGTTTGTT     |
| NUP155-F | TGAGAATCCCAGCCAAGTTT     |
| NUP155-R | TGGAGCTCAACAAGGTAACCA    |
| NUP188-F | ATAGGCACCTGGTGGATGAG     |
| NUP188-R | CAGGATGAGGGCACTGAAGTA    |
| NUP205-F | TAGACGGGGAAAGACATGGA     |
| NUP205-R | TGCTCCATCAGCTCATCTGT     |
| NUP54-F  | TGCAGAATCATTTTGGAGCA     |
| NUP54-R  | ATGGCTAAGGCCTTCCTGTT     |
| NUP58-F  | TGGGAGGTTCACTTTTCCAG     |
| NUP58-R  | TTGCCTGCAGTTGAAGTAGC     |
| NUP62-F  | ACATCGATGCACAGCTCAAG     |
| NUP62-R  | ACTGCAGTGAGTCCATGTGC     |
| NUP98-F  | CAAAGAATACCGGCCTGAAA     |
| NUP98-R  | GGATGCTCCTCCTCCTCTTC     |
| RAE1-F   | TTGCAGGATCATGGGCTAAT     |
| RAE1-R   | GGCTTTTGAATGGTCTGTC      |
| NUP37-F  | TCAGATCTTCAGGATAAAAATGAA |
| NUP37-R  | GGGATCAAACACCAAACCAT     |
| NUP43-F  | GAATTGTCGCTGCTTCATCA     |
| NUP43-R  | TCCACTGCTGGTTGACTGAC     |
| NUP85-F  | AGGGGAGATGCTGGTATGTG     |
| NUP85-R  | CAACTTGGCACCATCTCTGA     |
| NUP96-F  | ACTGGGACAGCATTTGGAAC     |
| NUP96-R  | ATGAAGGTGCACTGGTTGTG     |
| NUP107-F | TCAGAGGGATTCACTTGTTTCG   |
| NUP107-R | TCCAATTTTCATCTTTGGCAAT   |
| NUP133-F | TGCCAAATGTCAGATGCAGT     |
| NUP133-R | GAAAAGTTTGGGACCGTCAA     |

|          |                         |
|----------|-------------------------|
| NUP160-F | CACCAGGACAATTCACAAATG   |
| NUP160-R | CAGTTCCTCGGCAGAAAATC    |
| SEH1-F   | GGTGATTGGCATTGTACTGCT   |
| SEH1-R   | CACACGCCATACAGATCCAC    |
| SEC13-F  | GGCTTGTGCTGGAAAAGATG    |
| SEC13-R  | TGGGAGGTATCCACAGTGTT    |
| ELYS-F   | TGTGCTTCGTGGAAAGTTTG    |
| ELYS-R   | CCAAGCAAGCAAGTCCATT     |
| NUP358-F | CTGACGTGGAGCGGTACAT     |
| NUP358-R | CAGCTTTGCAAAATAGAATCCTT |
| NUP214-F | CCAAGTGGAATCACCATCA     |
| NUP214-R | GAGAACTGGAGCAGGAGGAA    |
| NUP88-F  | CCTAAAAGATGGGGGAAGAA    |
| NUP88-R  | AAAATCTCTCCGCAACTGGA    |
| POM121-F | CCTTGATGGCCAGGAAAATA    |
| POM121-R | TGTCCACTGCCACTGCTATC    |
| NDC1-F   | AGGTGCGGGACATACTG       |
| NDC1-R   | CAACTATCCTCCAGCCCAA     |
| NUP210-F | ACGTGGTCGAACCTGGATAC    |
| NUP210-R | TCACCAGGTGAACAGTGAA     |
| NUP153-F | TCAGGCCAAAAGAGAAAAGG    |
| NUP153-R | TGGCTTTGGGGTCATAAGTC    |
| TPR-F    | GCGGCTTGAGCTAGAGAAAC    |
| TPR-R    | CAATATTGCGATCCTGAGCA    |
| NUP50-F  | CAAGTTGGGCAGGACTCATC    |
| NUP50-R  | GCGCTTTGCTTTCTTTATGG    |
| GAPDH-F  | GTCAGTGGTGGACCTGACCT    |
| GAPDH-R  | AGGGGTCTACATGGCAACTG    |
