# Supplementary material for: Discovery of a Novel Aminocyclopropenone Compound That Inhibits BRD4-Driven Nucleoporin NUP210 Expression and Attenuates Colorectal Cancer Growth
Source: Cells. 2022 Jan 18;11(3):317. doi: 10.3390/cells11030317 (PMC8833887; doi:10.3390/cells11030317)
Supplement: Supplementary file 1 [file cells-11-00317-s001.zip]

Archive with 5 entries (5 files):
- molecular_formula_strings_aminocyclopropenones.xlsx
- Supplementary Figure S1.pdf
- Supplementary Figure S2.pdf
- Supplementary Figure S3-S7.pdf
- Supplementary table.pdf
