# Supplementary material for: Discovery of a Novel Aminocyclopropenone Compound That Inhibits BRD4-Driven Nucleoporin NUP210 Expression and Attenuates Colorectal Cancer Growth
Source: Cells. 2022 Jan 18;11(3):317. doi: 10.3390/cells11030317 (PMC8833887; doi:10.3390/cells11030317)
Supplement: Supplementary file 1 [file cells-11-00317-s001.zip › molecular_formula_strings_aminocyclopropenones.xlsx]

## Sheet: Sheet1
Compound_ID	SMILES
1a	O=C1C(N(CC)CC)=C1C2=CC=CC=C2
1b	O=C1C(N(C(C)C)C(C)C)=C1C2=CC=CC=C2
1c	O=C1C(N(C2CCCCC2)C3CCCCC3)=C1C4=CC=CC=C4
1d	O=C1C(N2CCCC2)=C1C3=CC=CC=C3
1e	O=C1C(N2C(C)(C)CCCC2(C)C)=C1C3=CC=CC=C3
1f	O=C1C(N(CC2=CC=CC=C2)CC3=CC=CC=C3)=C1C4=CC=CC=C4
1g	O=C1C(NC2=CC=CC=C2)=C1C3=CC=CC=C3
1h	O=C1C(N(C2=CC=CC=C2)C)=C1C3=CC=CC=C3
1i	O=C1C(N(C2=CC=CC=C2)C3=CC=CC=C3)=C1C4=CC=CC=C4
1j	O=C1C(N(C(C)=O)C(C)C)=C1C2=CC=CC=C2
1k	O=C1C(N(S(C)(=O)=O)C)=C1C2=CC=CC=C2
1l	O=C1C(N(S(C)(=O)=O)C(C)C)=C1C2=CC=CC=C2
1m	O=C1C(N(S(C)(=O)=O)C(C)(C)C)=C1C2=CC=CC=C2
1n	O=C1C(N(CC)CC)=C1C2=CC=C(OC)C=C2OC
1o	O=C1C(N(C(C)C)C(C)C)=C1C2=C(OC)C=C(OC)C=C2OC
1p	O=C1C(N(CC)CC)=C1C2=CC=C(OCC#C)C=C2
1q	O=C1C(N(C(C)C)C(C)C)=C1C2=CC=C(OCC#C)C=C2
1r	O=C1C(N(C2=CC=CC=C2)C)=C1C3=CC=C(OCC#C)C=C3
1t	O=C1C(N(CC)CC)=C1C2=CC=CS2
1u	O=C1C(N(C(C)C)C(C)C)=C1C2=CC=CC3=C2C=CC=C3
2n	COC1=CC=C(C(N(CC)CC)=O)C(OC)=C1
