# Supplementary figures and images for: Discovery of a Novel Aminocyclopropenone Compound That Inhibits BRD4-Driven Nucleoporin NUP210 Expression and Attenuates Colorectal Cancer Growth
Source: MDPI journal article supplement (doi:10.3390/cells11030317), 2022-01-18

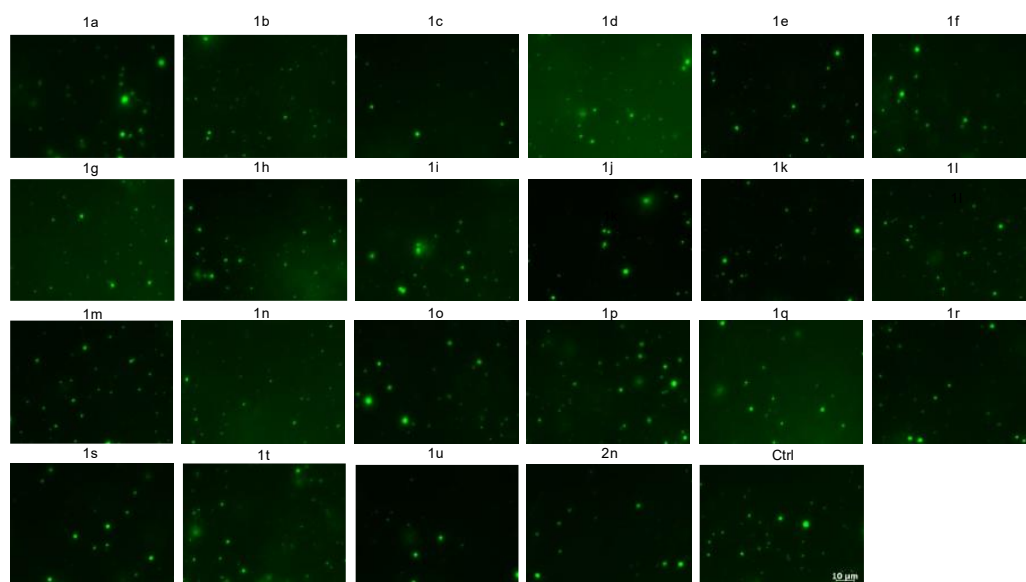

**Figure S2.** Representative BRD4 droplets pictures after each aminocyclopropenone treatment.

Supplement: s1 [file s1]
